# Supplementary material for: Upregulation of tRNA-Ser-AGA-2-1 Promotes Malignant Behavior in Normal Bronchial Cells
Source: PubMed Central journal article supplement (PMC9108184; doi:10.3389/fmolb.2022.809985), 2022-05-02
Supplement: Presentation1.pdf [file Presentation1.pdf]

All Western Blots used for protein quantification on Manuscript 809985  
Upregulation of tRNA-Ser-AGA-2-1 promotes malignant behavior in normal  
bronchial cells

# Puromycin Blots - Fig. 1C, bottom panel

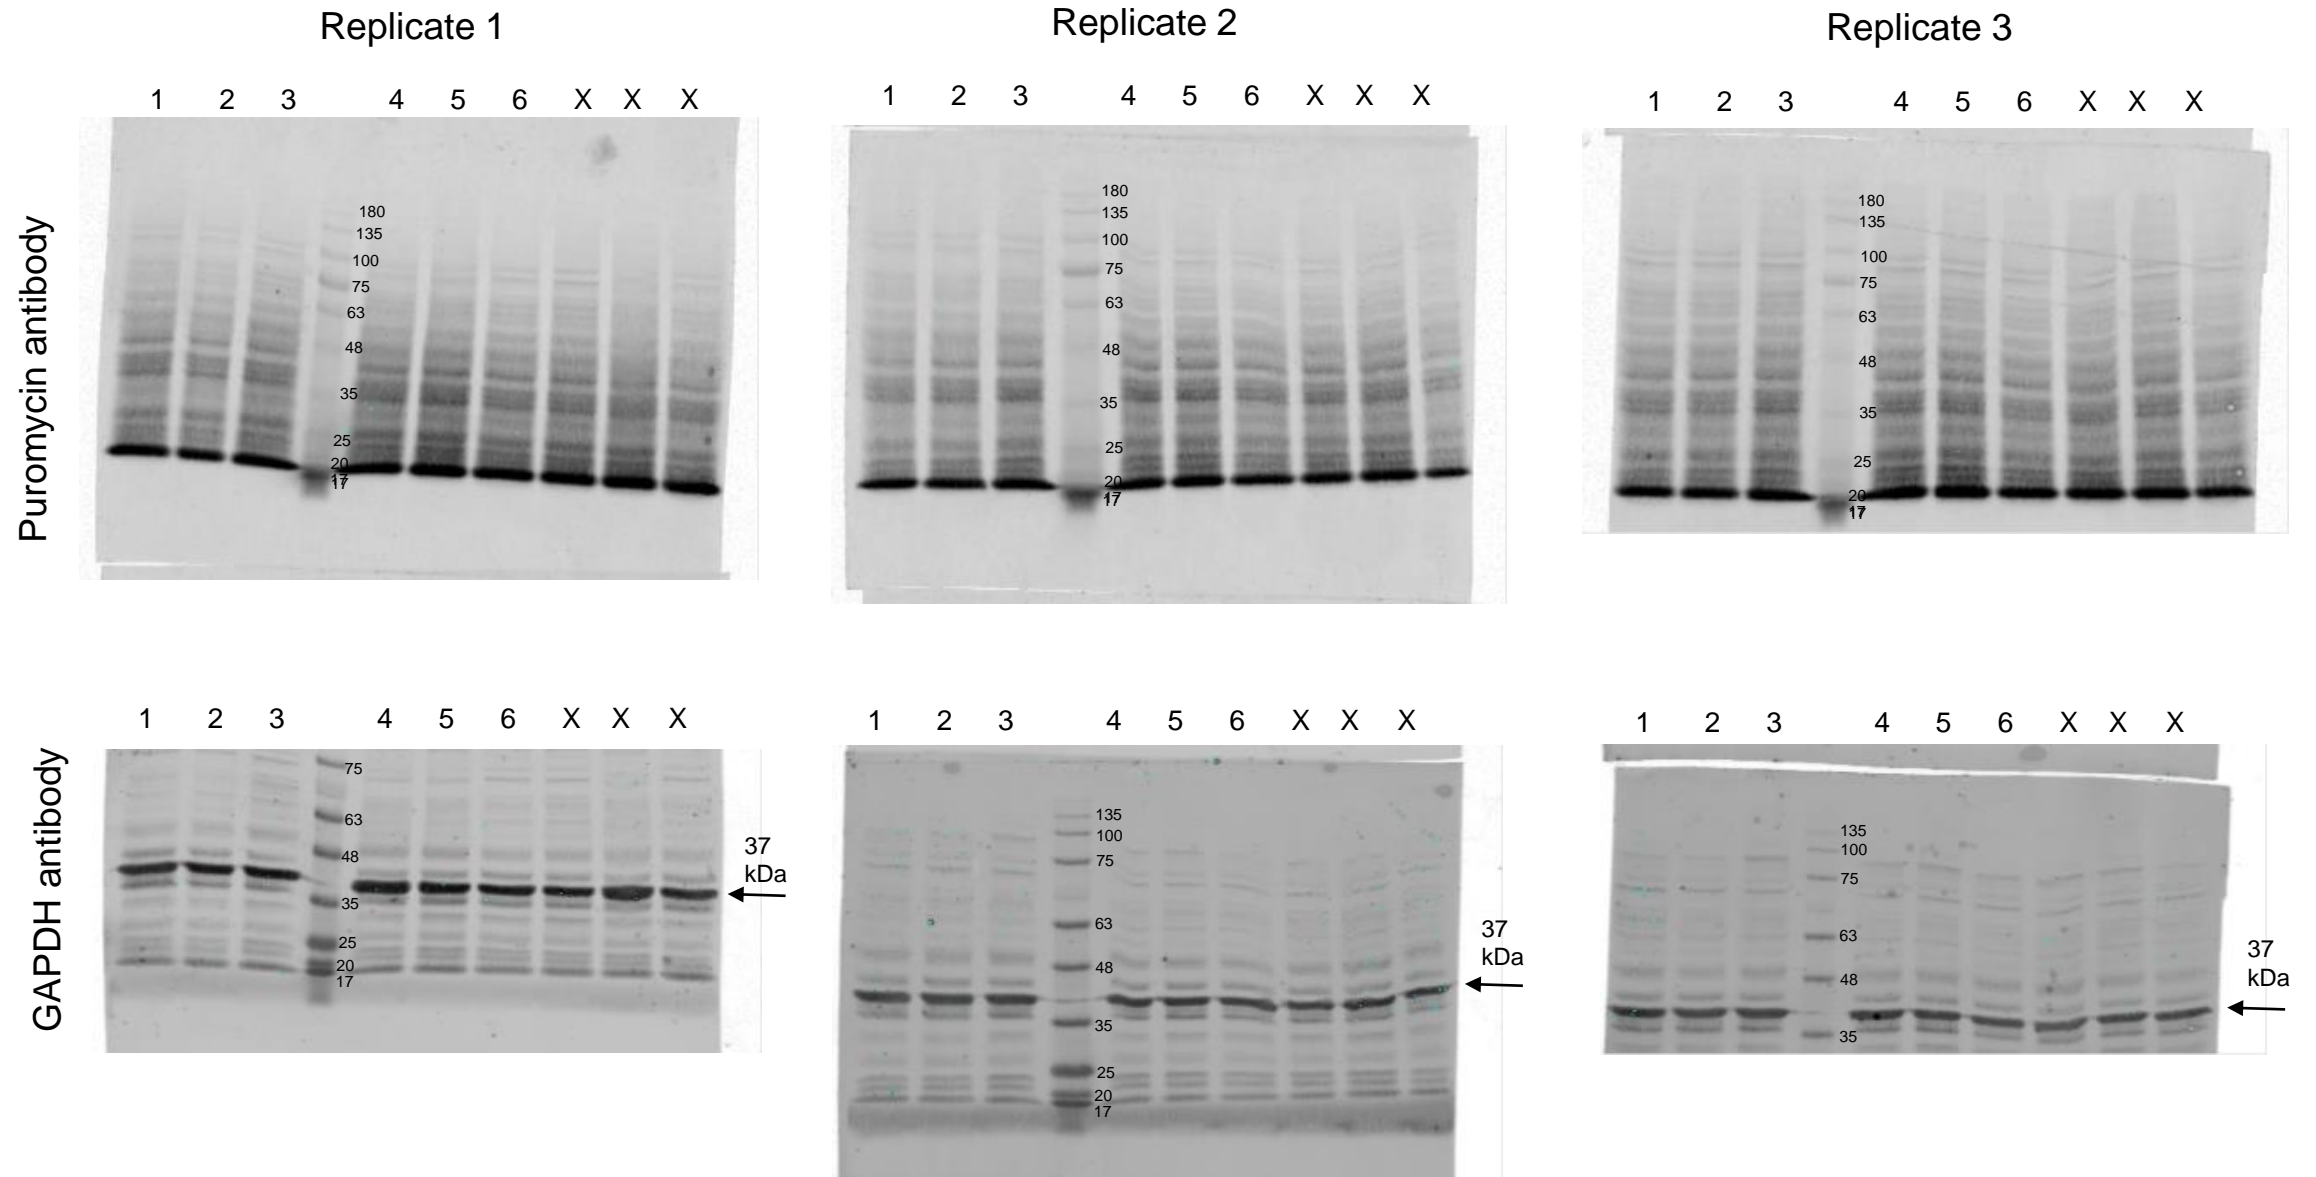

**Legend:** 1 - BEAS Mock 1; 2 - BEAS Mock 2; 3 - BEAS Mock 3; 4 - BEAS tRNA<sup>Ser</sup> 1; 5 - BEAS tRNA<sup>Ser</sup> 2; 6 - BEAS tRNA<sup>Ser</sup> 3; X – cell line containing a mutant tRNA not used in this manuscript

# BIP Fig. 2E

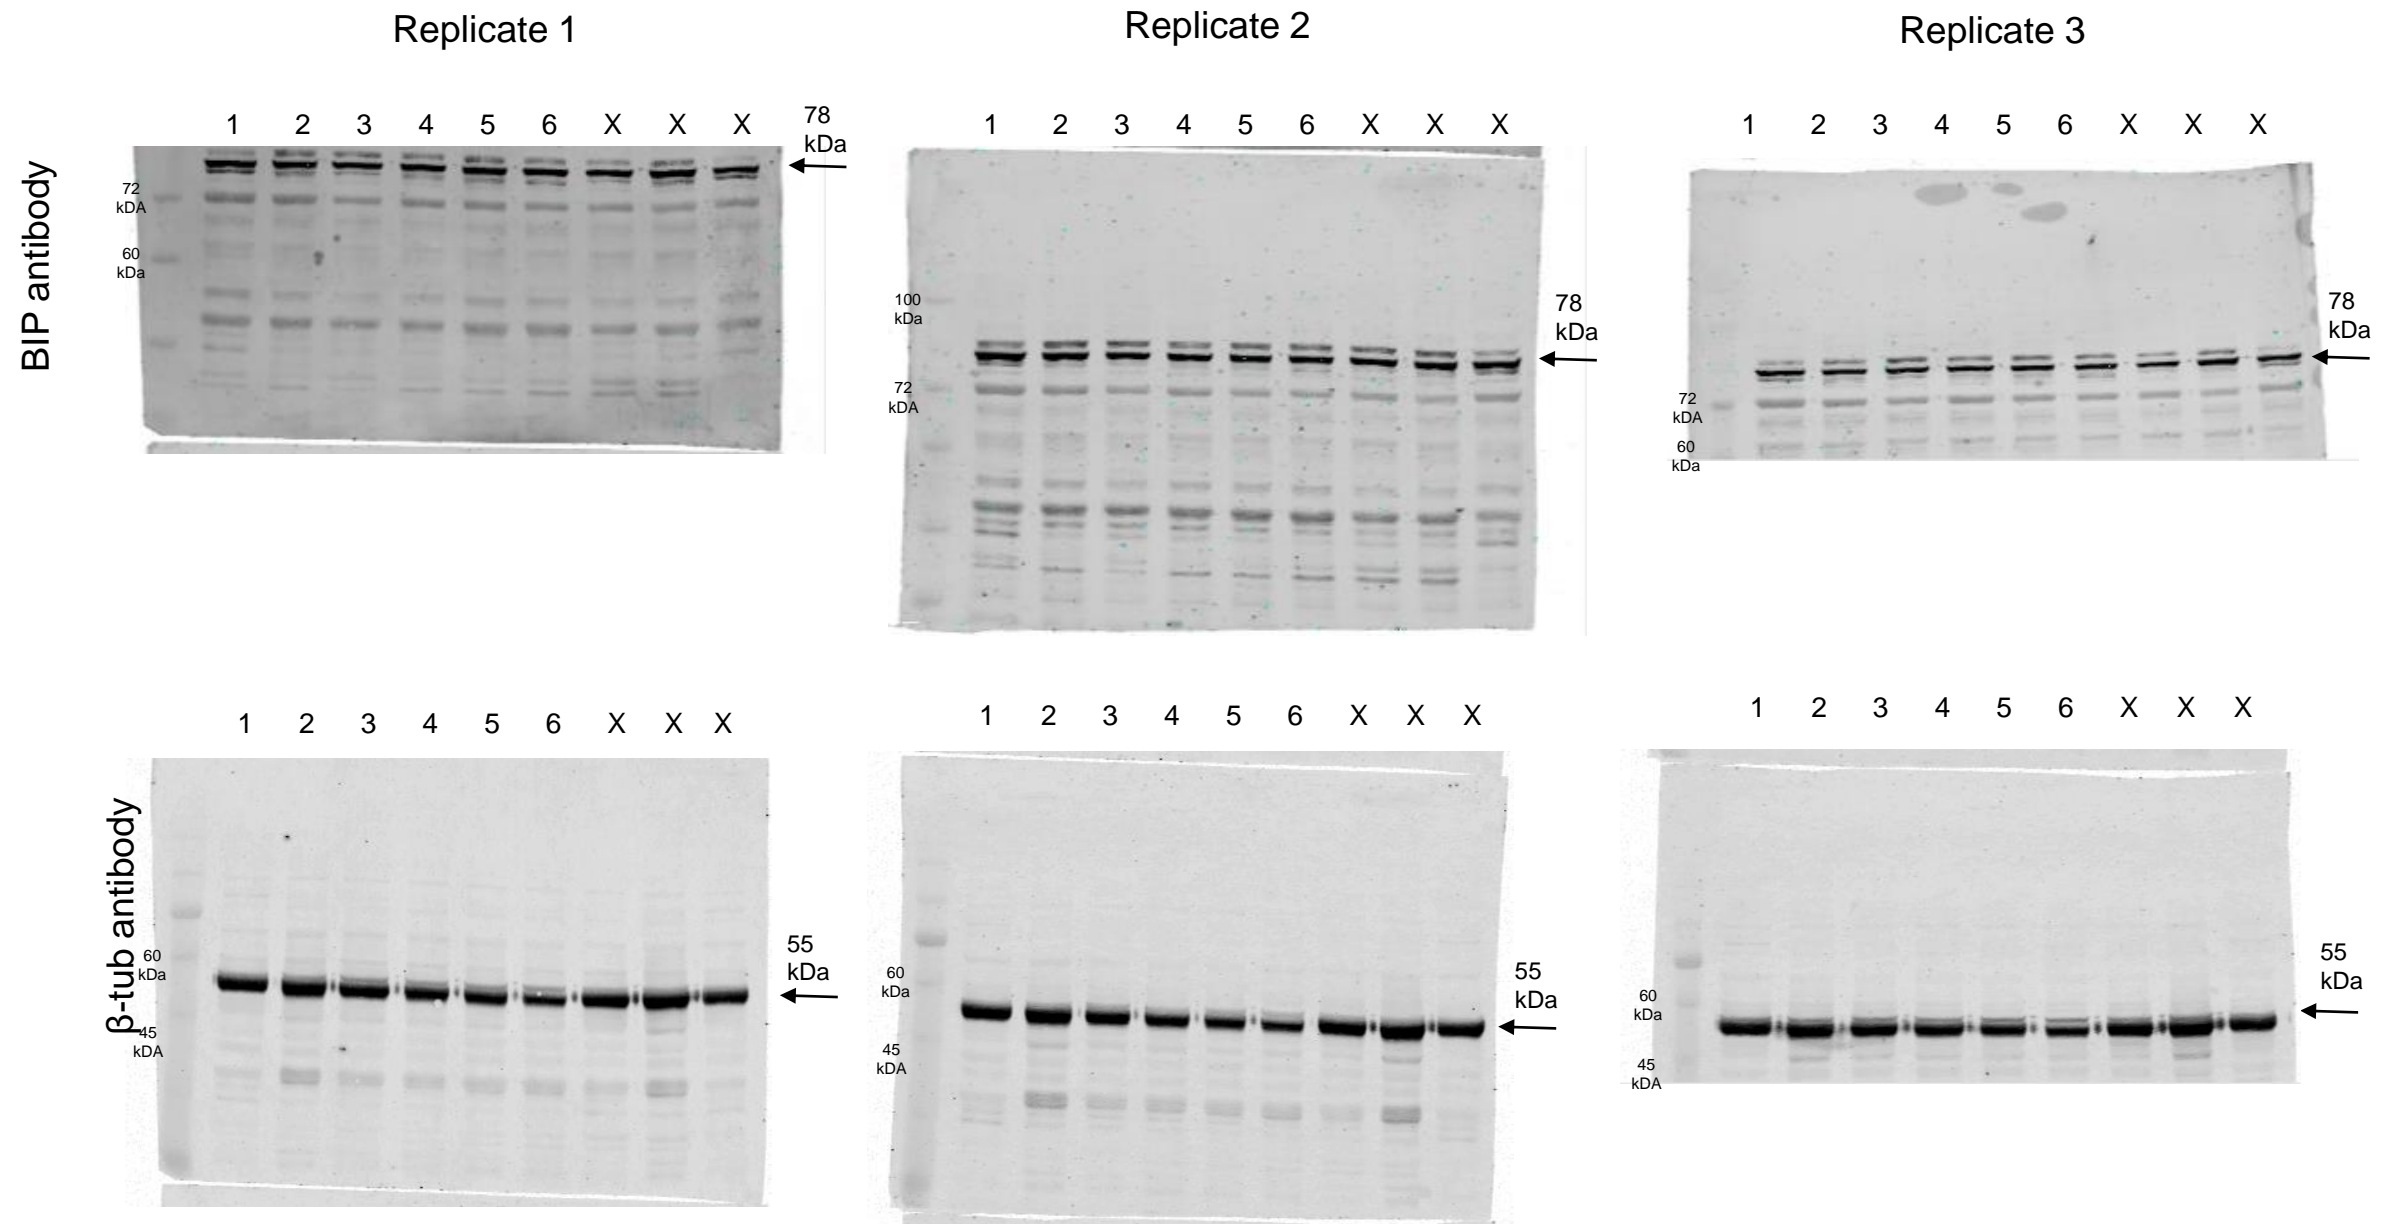

**Legend:** 1 - BEAS Mock 1; 2 - BEAS Mock 2; 3 - BEAS Mock 3; 4 - BEAS tRNA<sup>Ser</sup> 1; 5 - BEAS tRNA<sup>Ser</sup> 2; 6 - BEAS tRNA<sup>Ser</sup> 3; X – cell line containing a mutant tRNA not used in this manuscript

# ATF4-P Fig. 2E

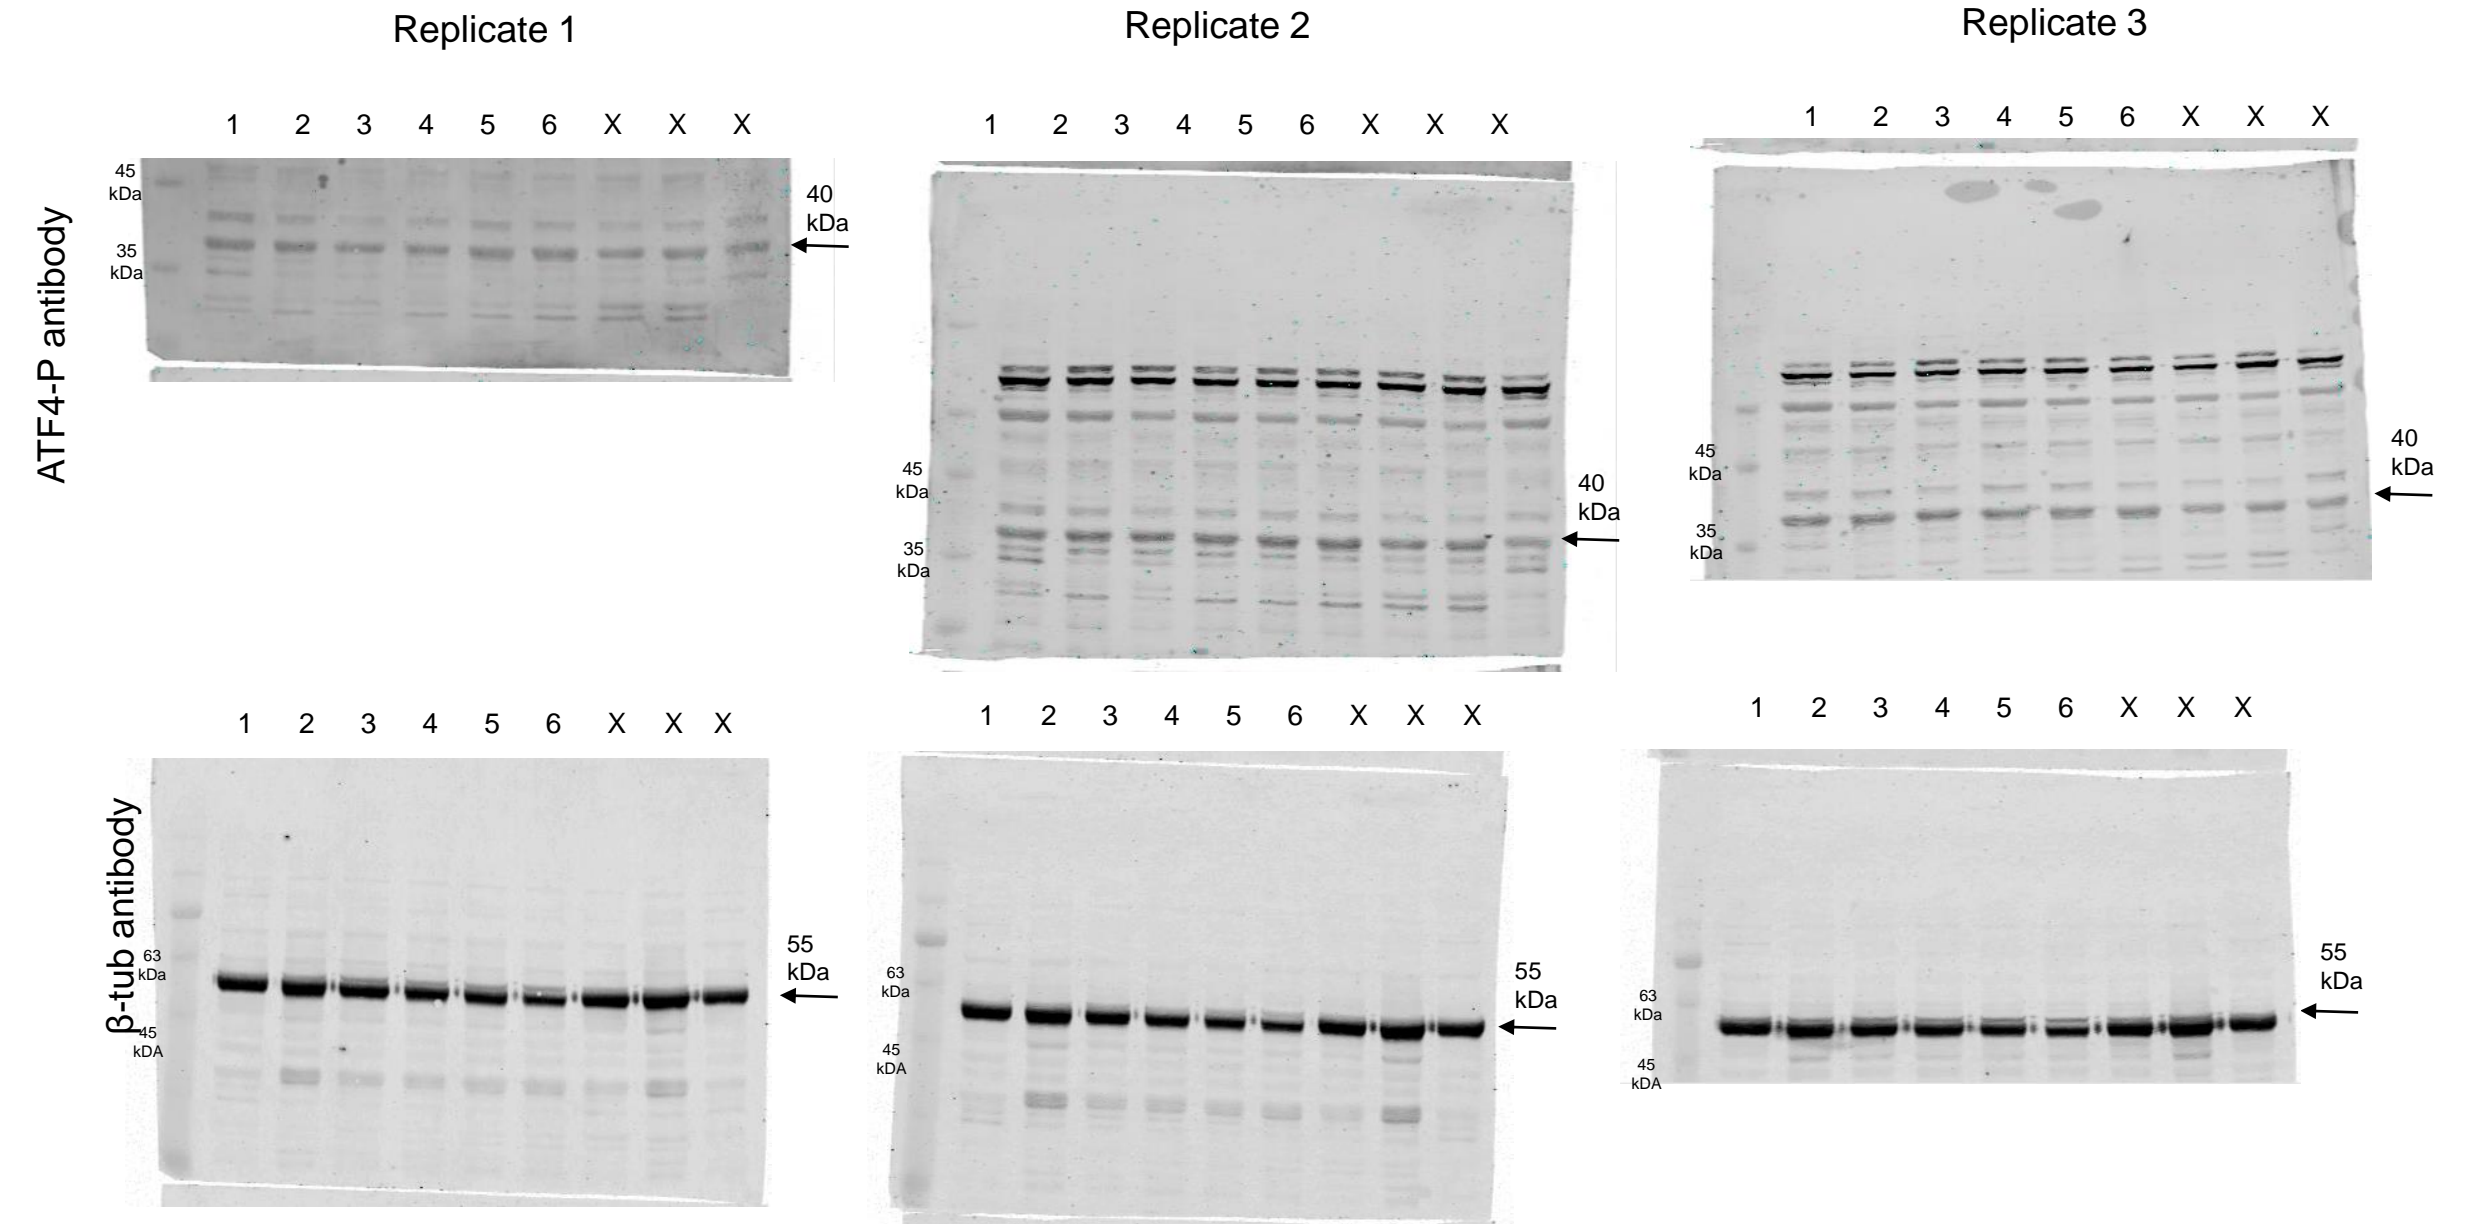

**Legend:** 1 - BEAS Mock 1; 2 - BEAS Mock 2; 3 - BEAS Mock 3; 4 - BEAS tRNA<sup>Ser</sup> 1; 5 - BEAS tRNA<sup>Ser</sup> 2; 6 - BEAS tRNA<sup>Ser</sup> 3; X – cell line containing a mutant tRNA not used in this manuscript

# ATF4 total Fig. 2E

Replicate 1

Replicate 2

Replicate 3

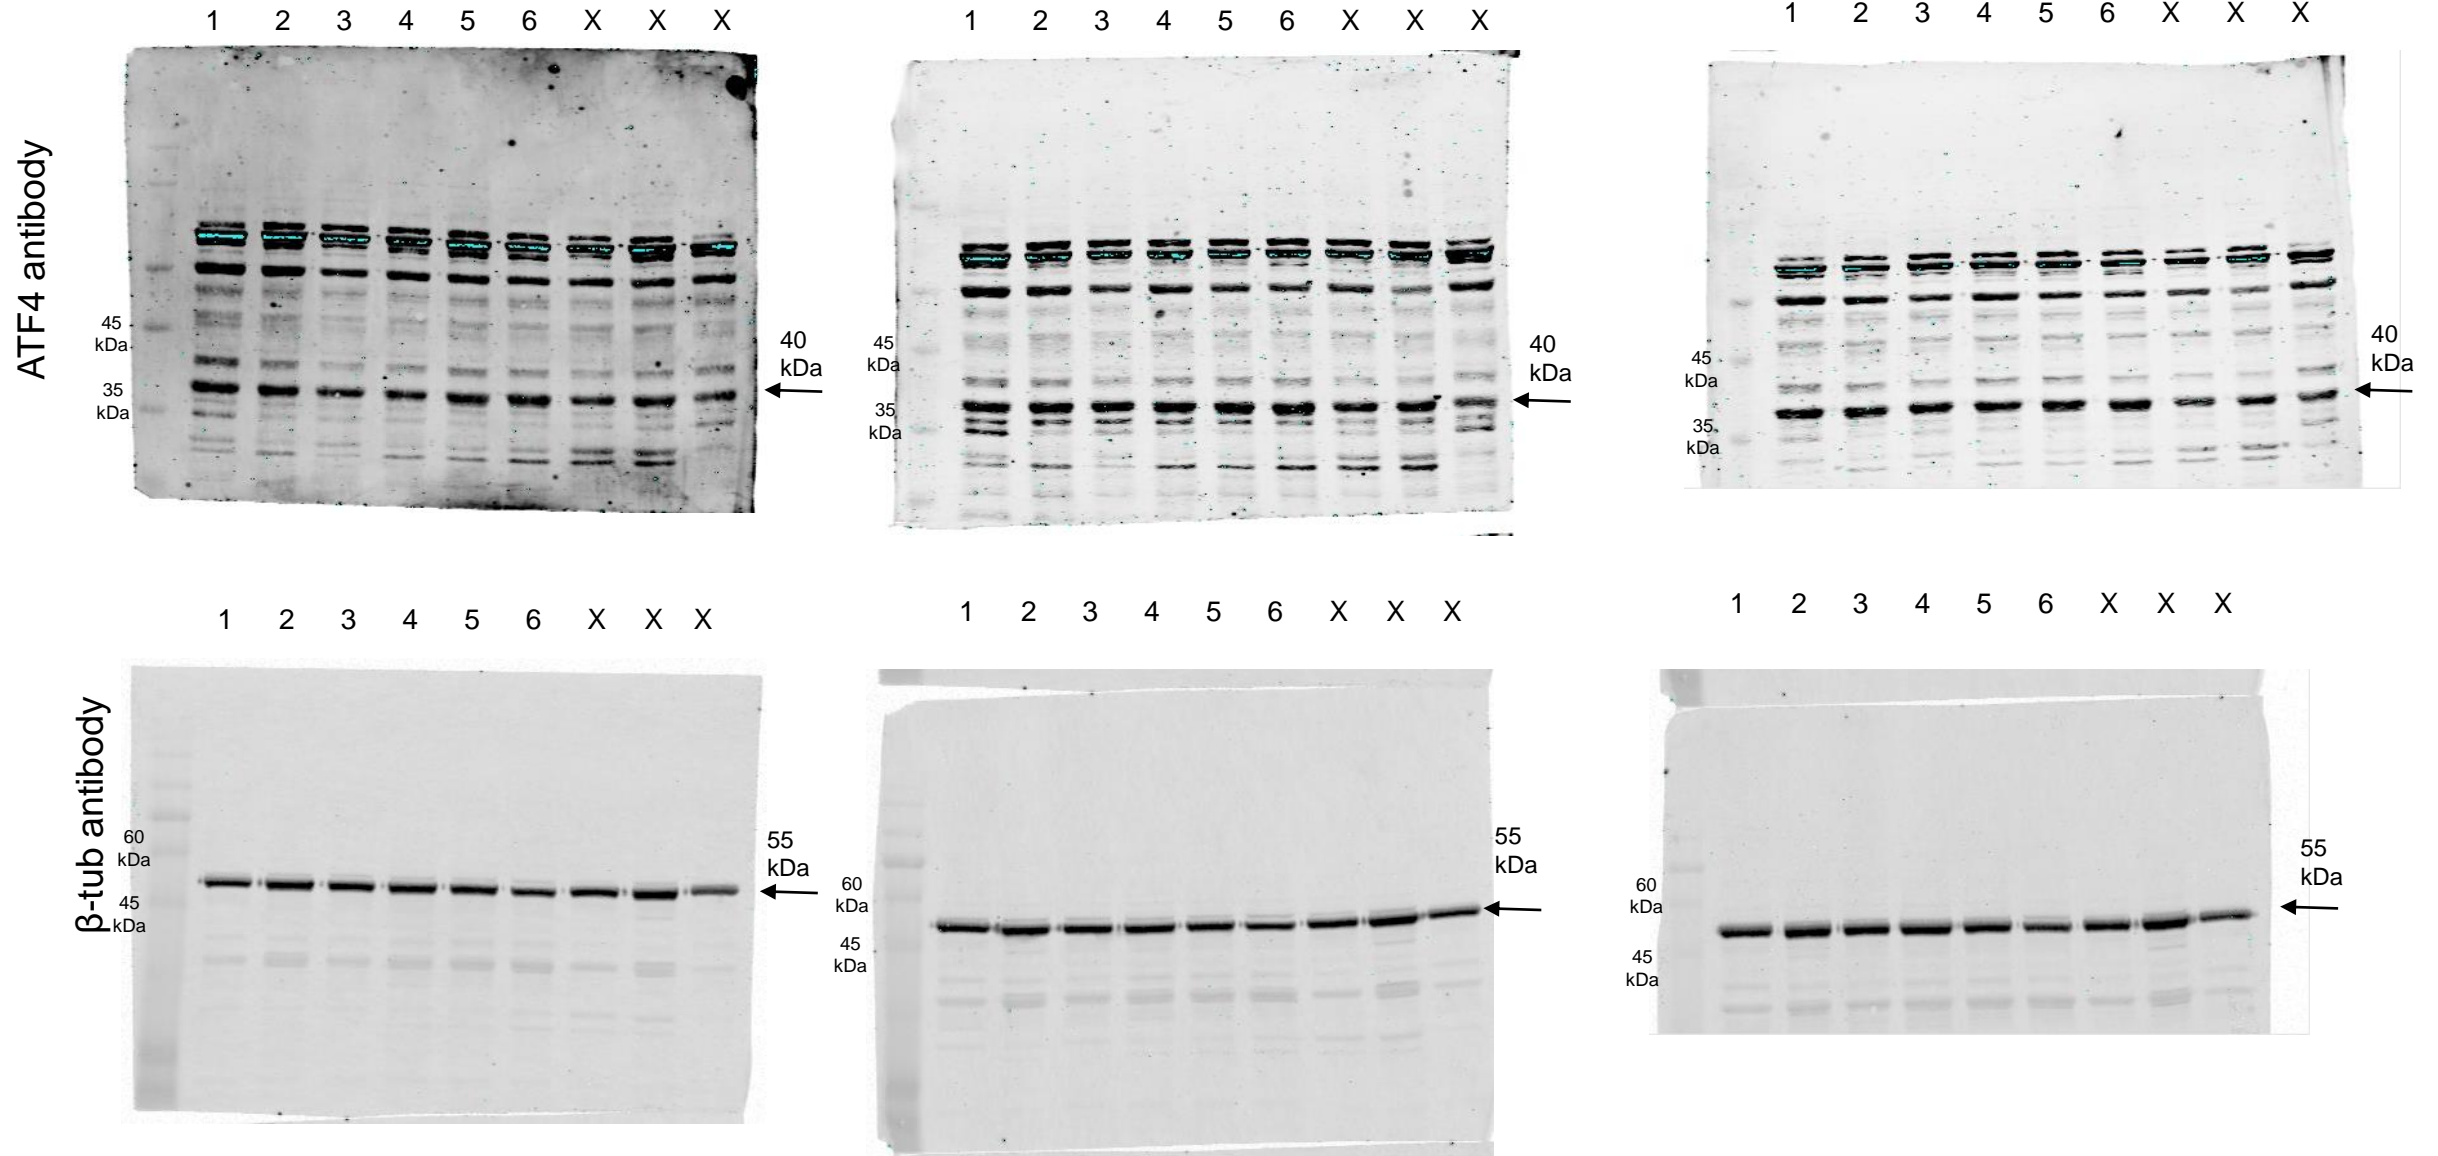

**Legend:** 1 - BEAS Mock 1; 2 - BEAS Mock 2; 3 - BEAS Mock 3; 4 - BEAS tRNA<sup>Ser</sup> 1; 5 - BEAS tRNA<sup>Ser</sup> 2; 6 - BEAS tRNA<sup>Ser</sup> 3; X - cell line containing a mutant tRNA not used in this manuscript

# eiF2a Fig. 2E

Replicate 1

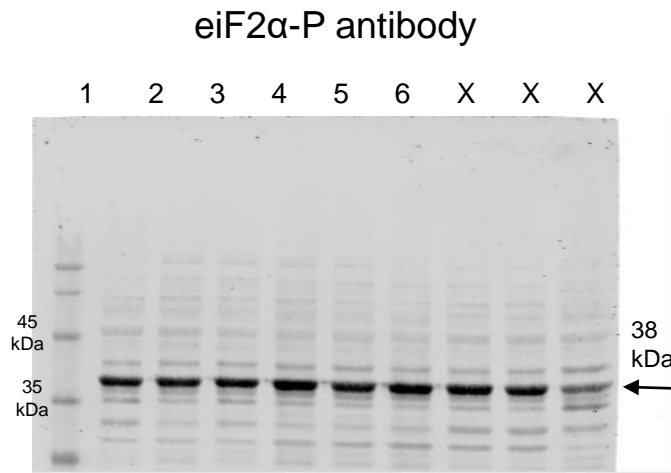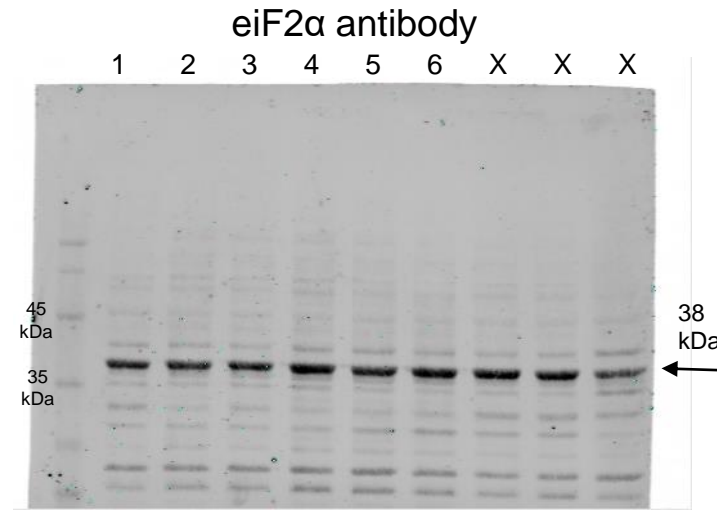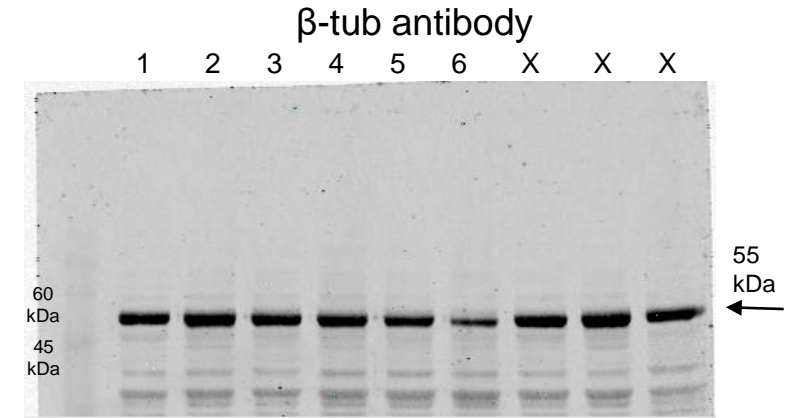

Rep. 2

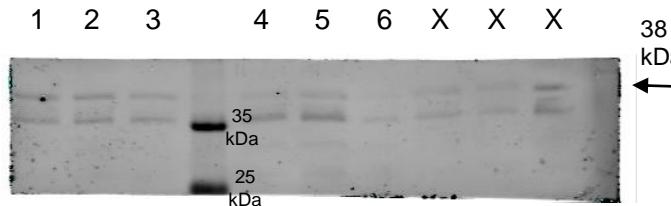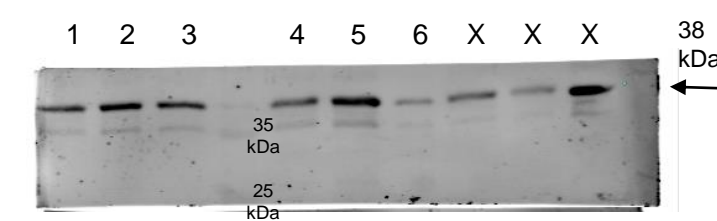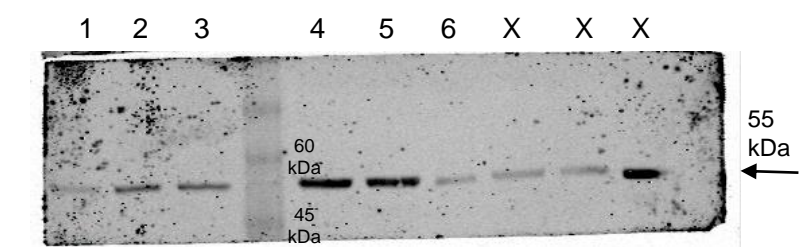

Rep. 3

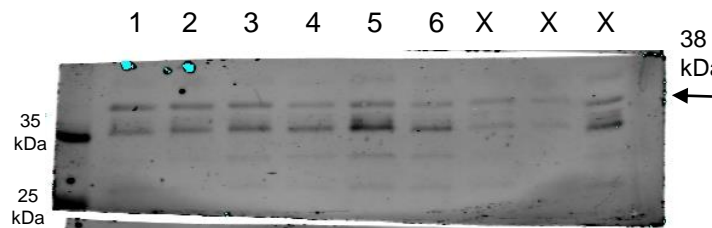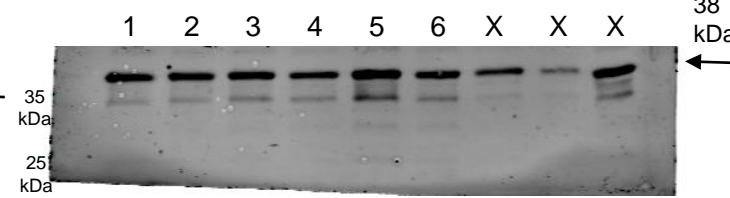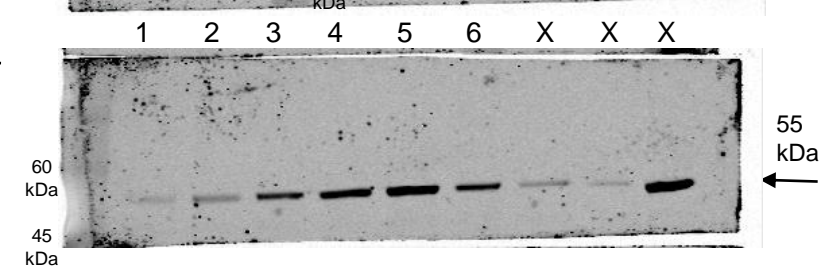

Rep. 4

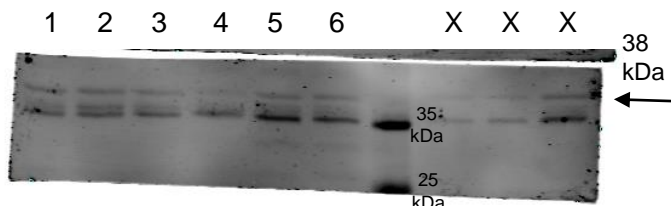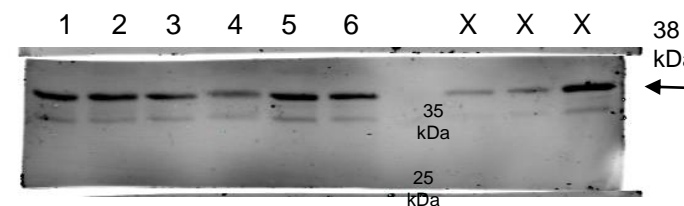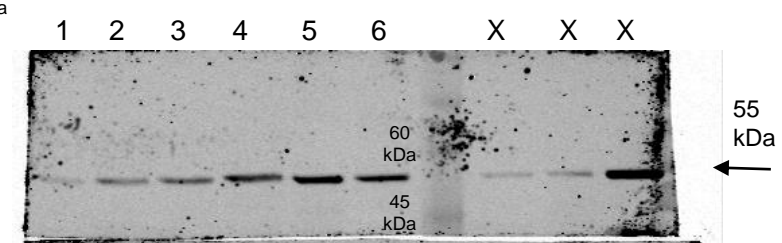

**Legend:** 1 - BEAS Mock 1; 2 - BEAS Mock 2; 3 - BEAS Mock 3; 4 - BEAS tRNA<sup>Ser</sup> 1; 5 - BEAS tRNA<sup>Ser</sup> 2; 6 - BEAS tRNA<sup>Ser</sup> 3; X - cell line containing a mutant tRNA not used in this manuscript

# GADD34 Fig. 2E

Replicate 1

Replicate 2

Replicate 3

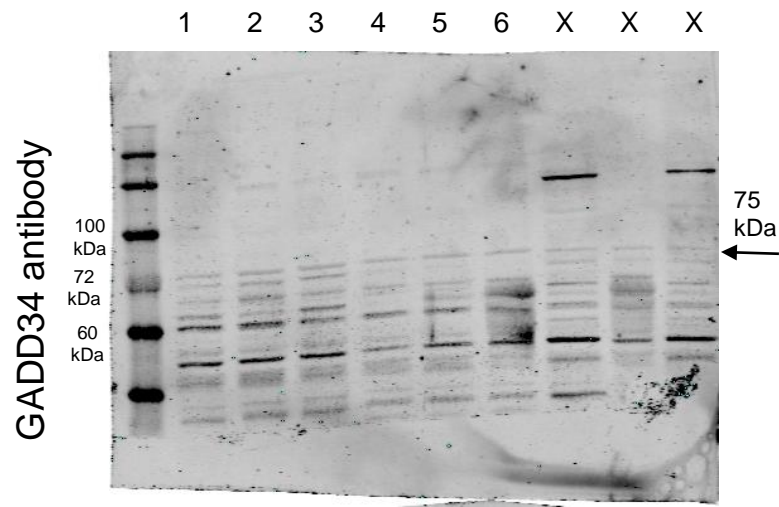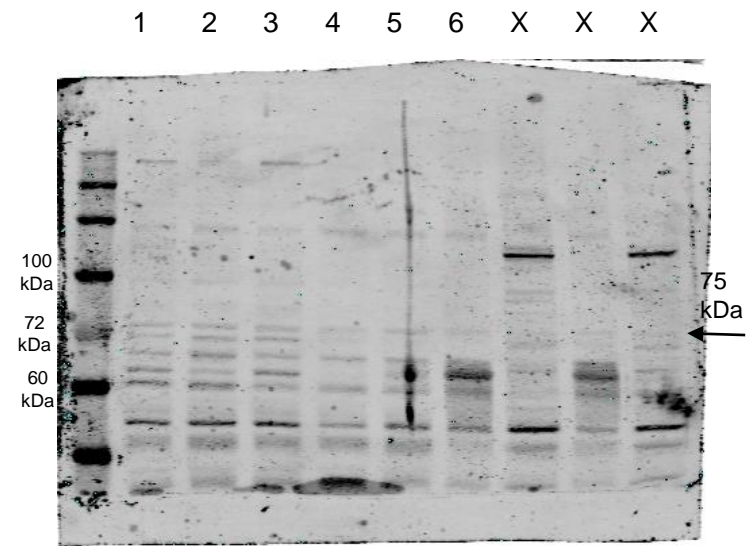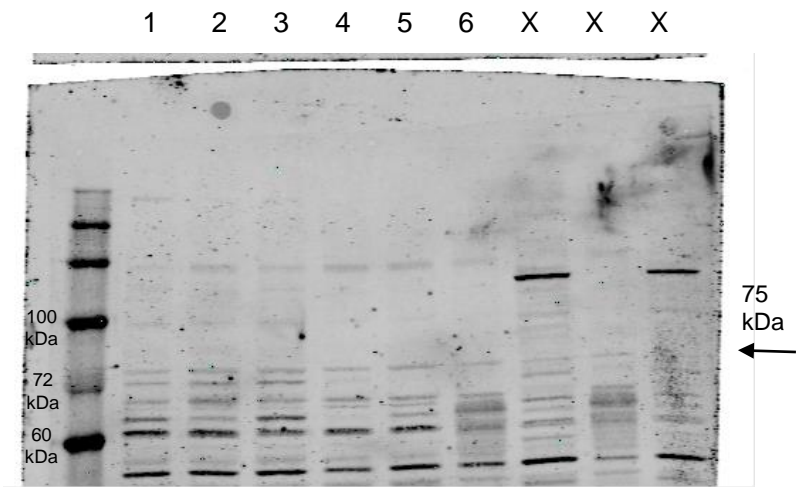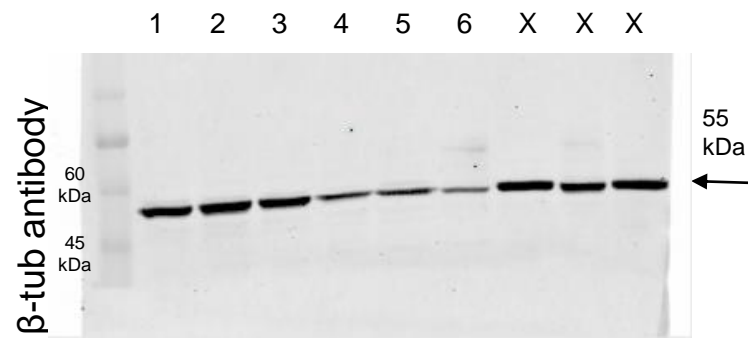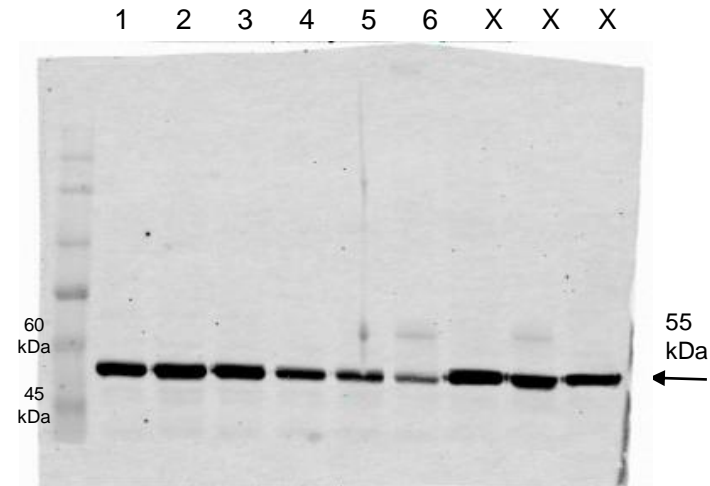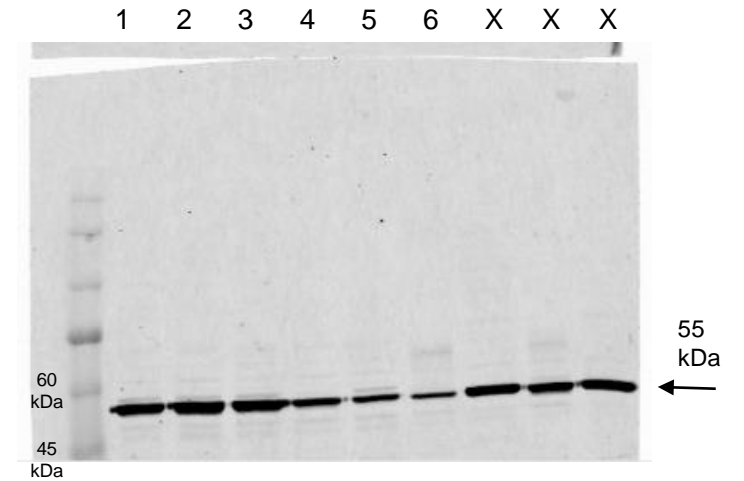

**Legend:** 1 - BEAS Mock 1; 2 - BEAS Mock 2; 3 - BEAS Mock 3; 4 - BEAS tRNA<sup>Ser</sup> 1; 5 - BEAS tRNA<sup>Ser</sup> 2; 6 - BEAS tRNA<sup>Ser</sup> 3; X - cell line containing a mutant tRNA not used in this manuscript
